# Supplementary material for: Definitive demonstration by synthesis of genome annotation completeness
Source: PubMed Central journal article supplement — Proc Natl Acad Sci U S A. 2019 Nov 12;116(48):24206–13. doi: 10.1073/pnas.1905990116 (PMC6883844; doi:10.1073/pnas.1905990116), 2019-11-12
Supplement: pnas.1905990116.sapp.pdf [file pnas.1905990116.sapp.pdf]

# PNAS

[www.pnas.org](http://www.pnas.org)

Supplementary Information for

**Definitive demonstration by synthesis of genome annotation completeness**

Paul R. Jaschke<sup>b,1</sup>, Gabrielle A Dotson<sup>a</sup>, Kay Hung<sup>a</sup>, Diane Liu<sup>a</sup>, and Drew Endy<sup>a,1</sup>

<sup>a</sup>Bioengineering Department, Stanford University, Stanford, CA, 94305

<sup>b</sup>Department of Molecular Sciences, Macquarie University, Sydney, NSW, 2066, Australia

<sup>1</sup>To whom correspondence may be addressed:

Paul R Jaschke  
Email: [paul.jaschke@mq.edu.au](mailto:paul.jaschke@mq.edu.au)

Drew Endy  
Email: [endy@stanford.edu](mailto:endy@stanford.edu)

**This PDF file includes:**

Figures S1 to S7  
Tables S1 to S2

**Other supplementary materials for this manuscript include the following:**

Datasets S1 to S4

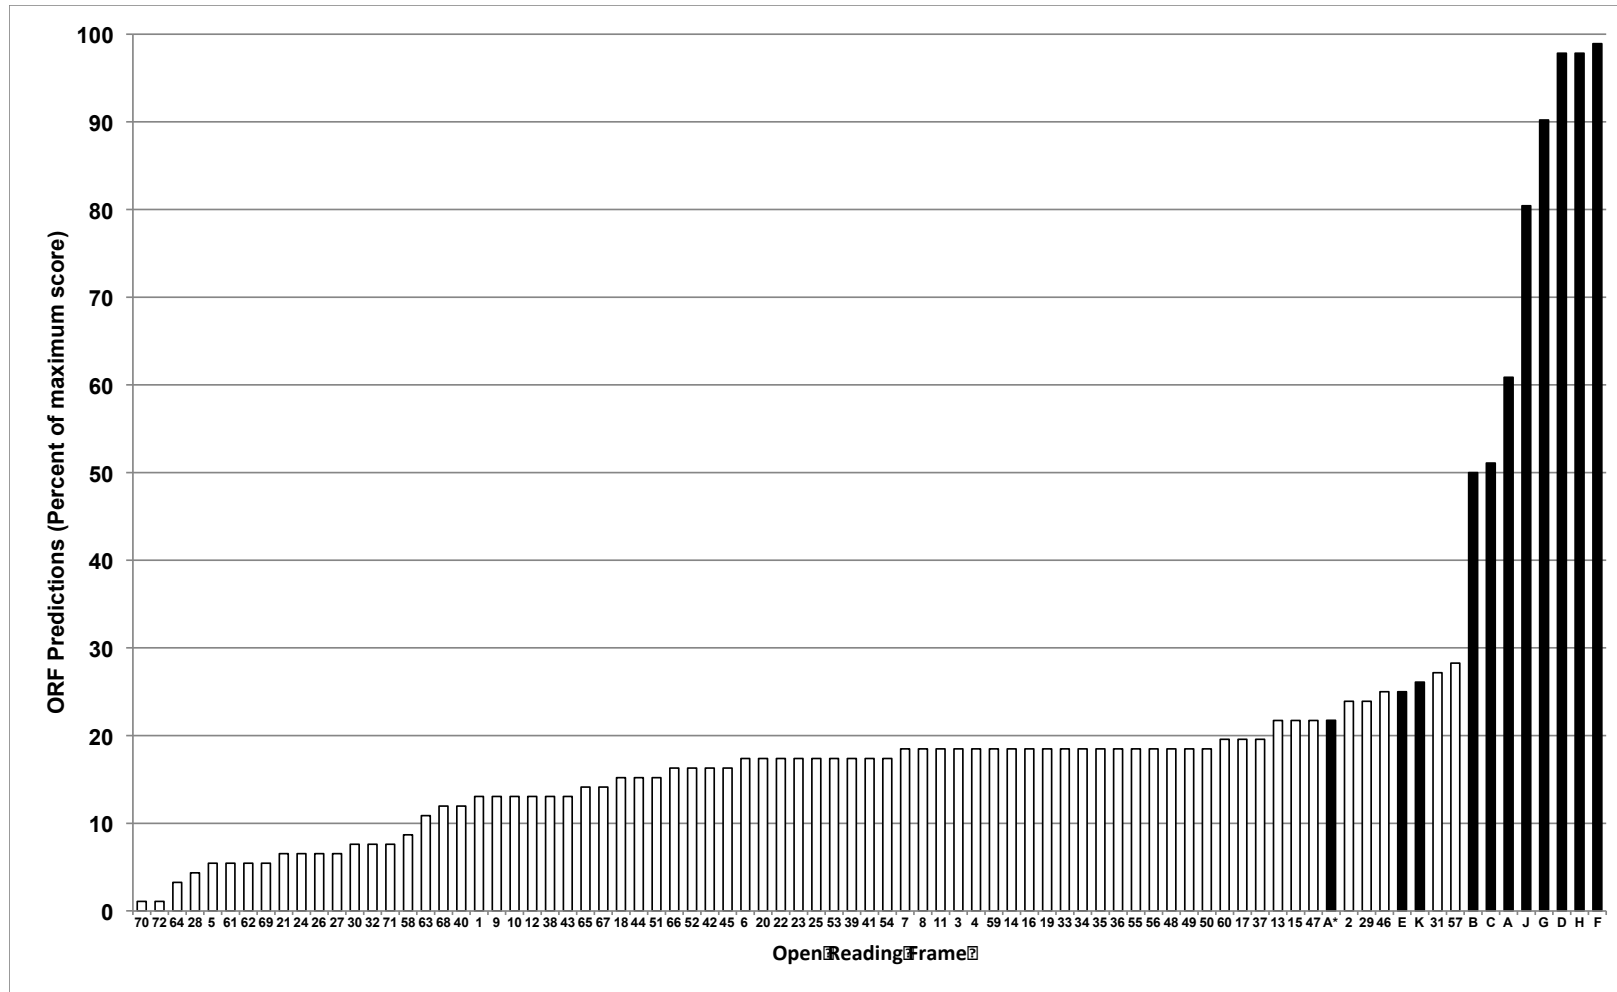

**Fig. S1. Computational ORF predictions.** ORFs were given a score based on the number of times it was identified across 23 *Bullavirinae* genomes (92 possible identifications for each ORF, based on four computational tools and 23 genomes). Seventy-two cryptic ORFs (white bars) and 11 previously discovered ØX174 protein-coding ORFs (black bars).

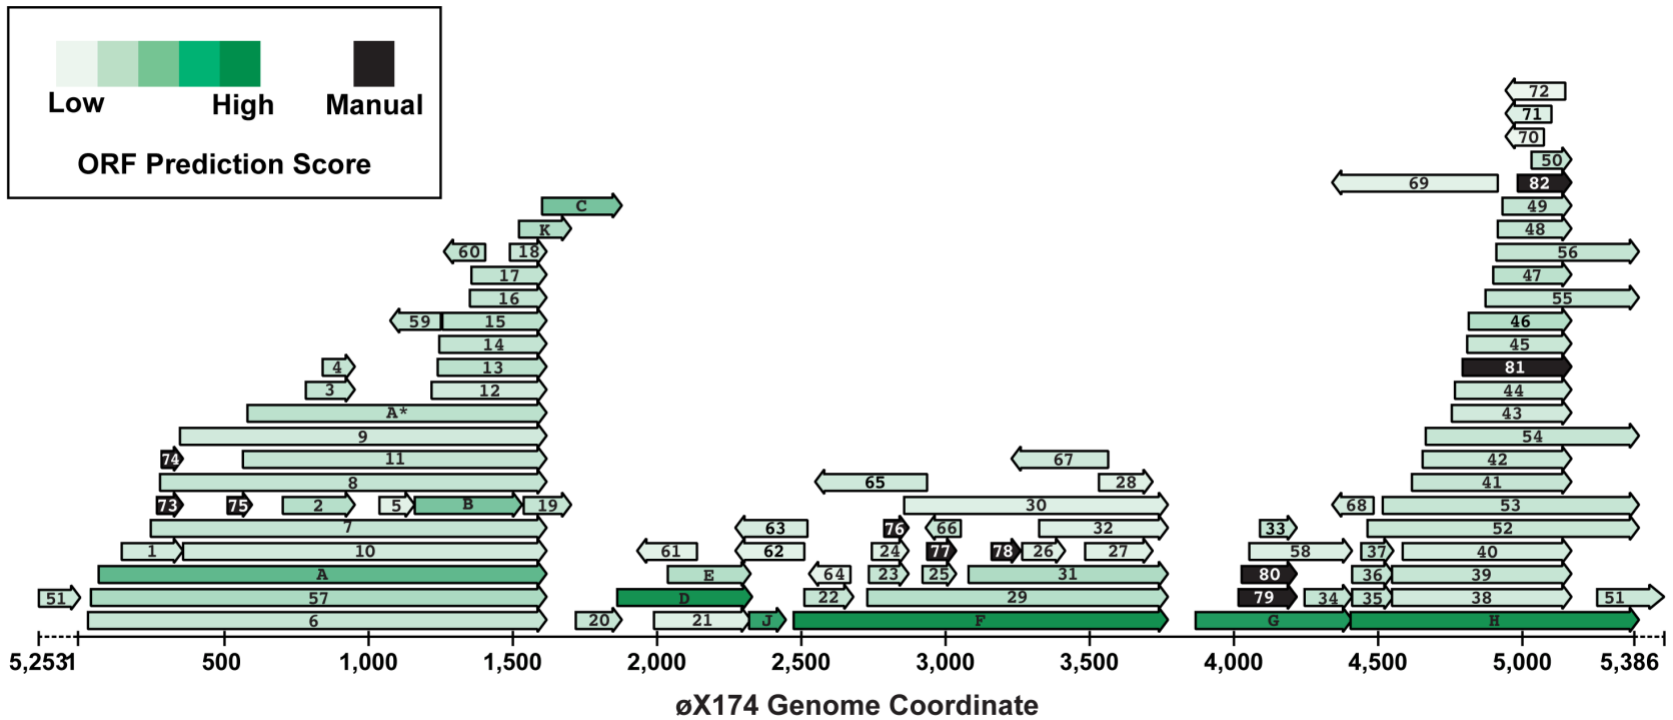

**Fig. S2. Computationally identified ORF locations on øX174 genome.** ORFs were given a score based on the number of times it was identified across 23 *Bullavirinae* genomes (92 possible identifications for each ORF, based on four computational tools and 23 genomes). Black ORFs indicate 10 expert-curated cryptic ORFs (1).

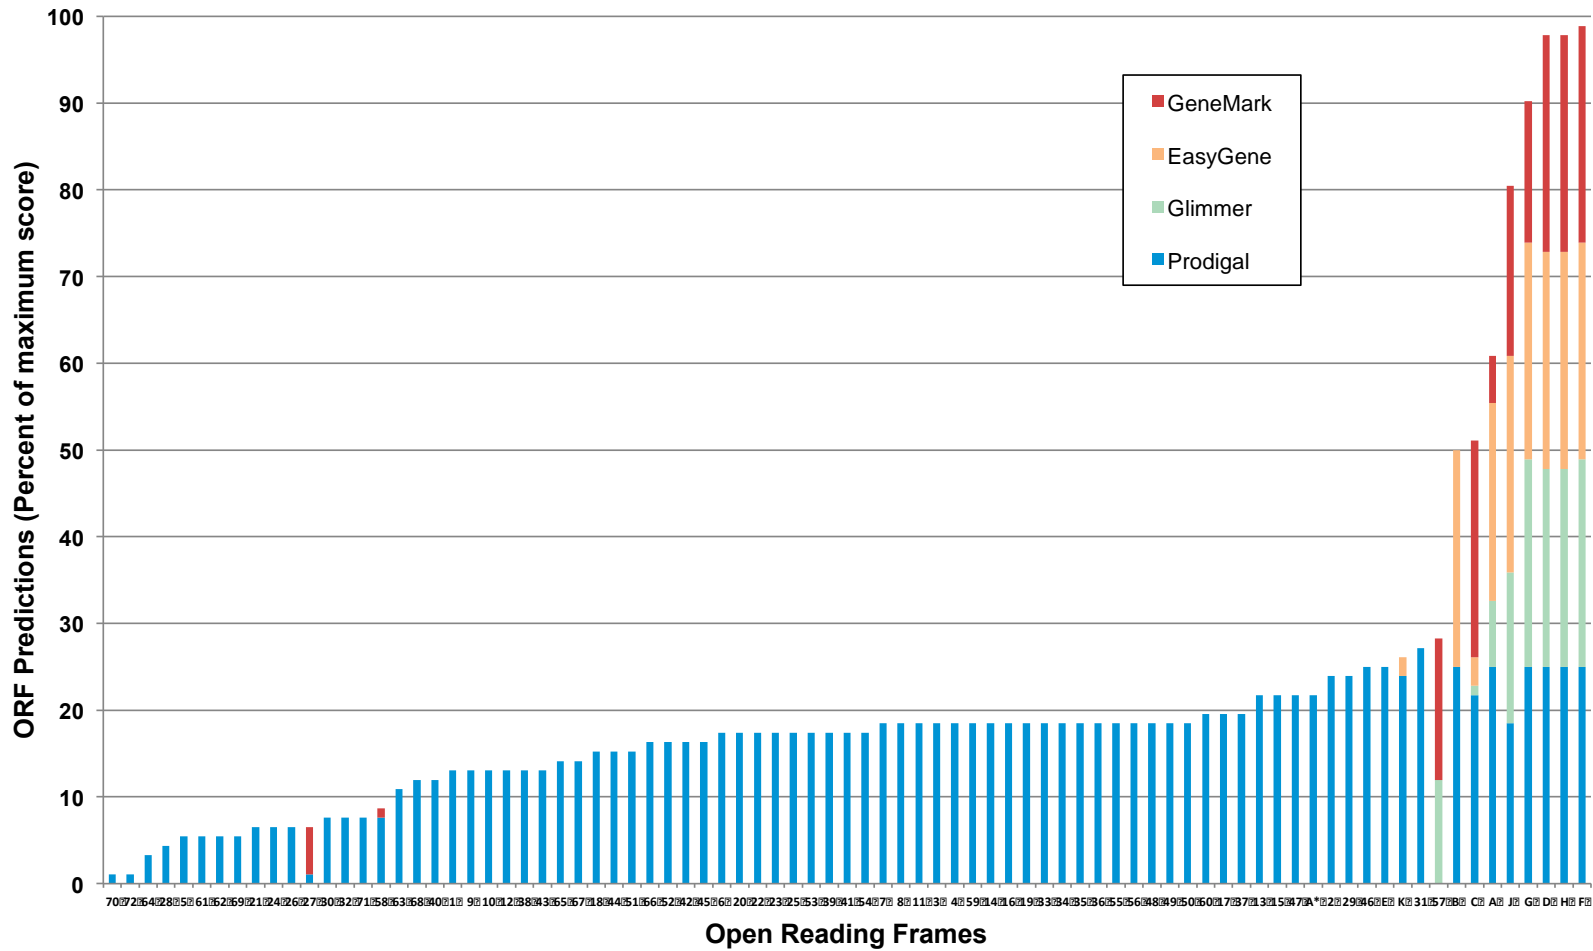

**Fig. S3. Computational tool contributions to ORF prediction scores.** Identified ORFs were given a score based on the number of times it was identified across 23 *Bullavirinae* genomes (92 possible identifications for each ORF, based on four computational tools and 23 genomes). Four standard gene prediction tools were used: GLIMMER (2), GeneMark (3) using the GeneMark.hmm PROKARYOTIC (Version 2.10b) algorithm, EasyGene (4), and Prodigal (5).

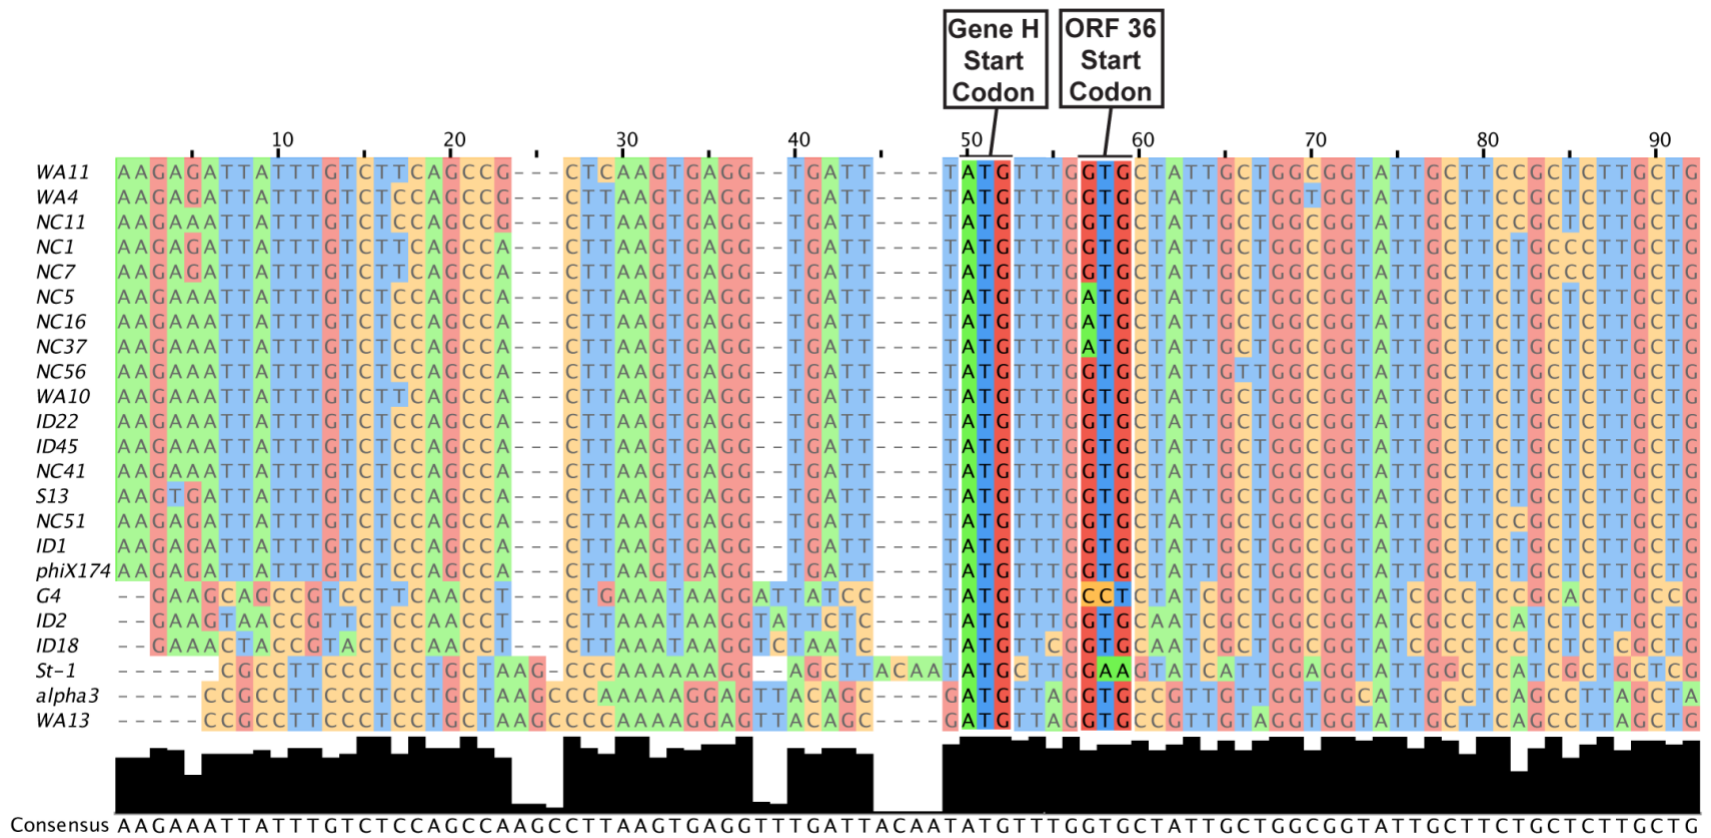

**Fig. S4. Multiple sequence alignment of Gene H/ORF 36 regions from 23 *Bullavirinae* genomes.** Multiple sequence alignment of 83 nt centered on the start codon of gene H performed with MUSCLE (6) multiple sequence alignment algorithm. Height of the black bars below each nucleotide represents degree of conservation within that column.

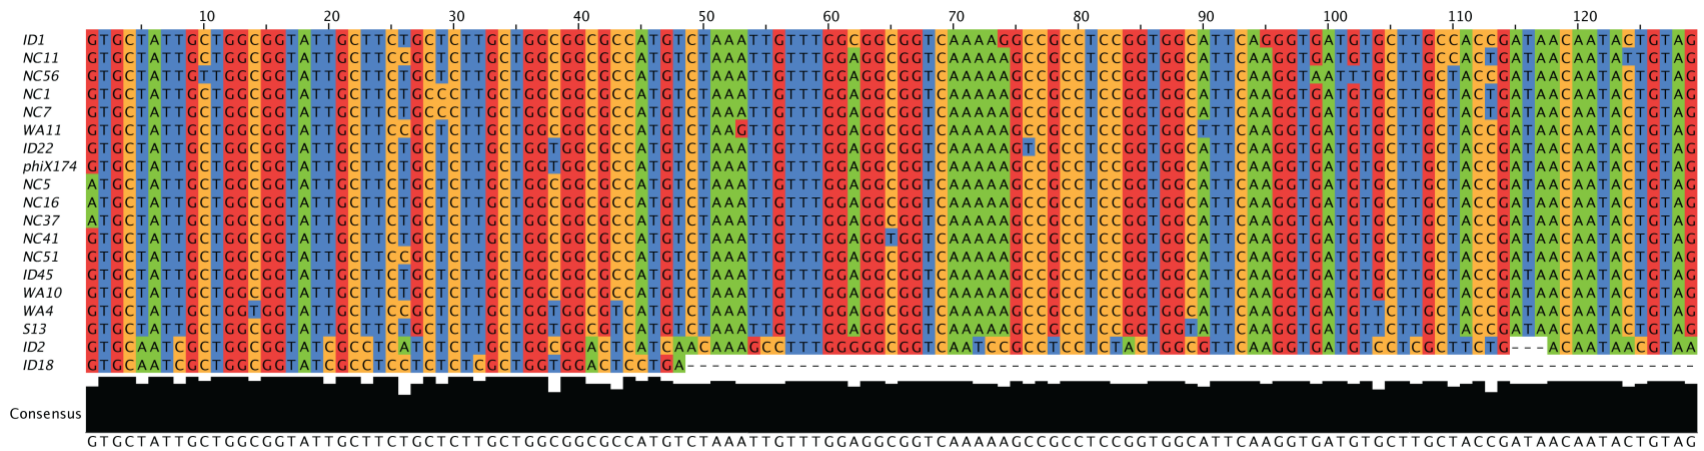

**Fig. S5. Multiple sequence alignment of ORF 36 from 19 *Bullavirinae* genomes.** Multiple sequence alignment of ORF 36 performed with MUSCLE multiple sequence alignment algorithm. WA13 and alpha3 ORF36 sequences not included in alignment because their short length disrupted the alignment. G4 and st-1 ORF36 sequences lack strong start codons and were not included in the alignment. Height of the black bars below each nucleotide represents degree of conservation within that column.

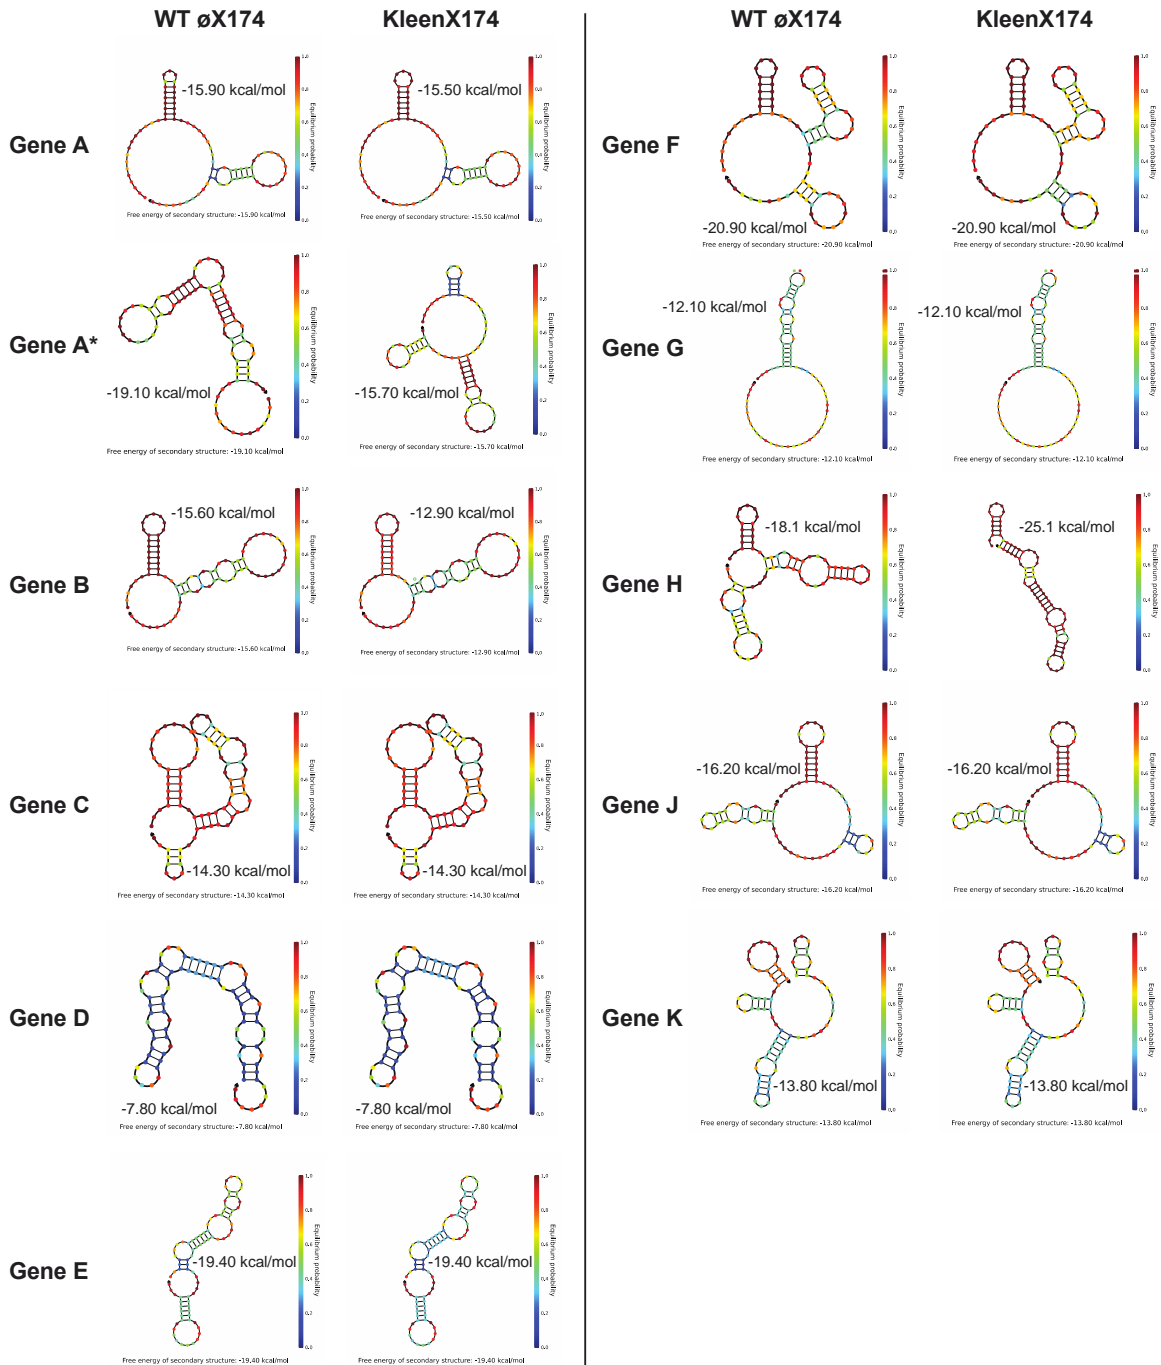

**Fig. S6. Simulated RNA folding structures of all known  $\phi$ X174 protein-coding ORFs in WT and kleenX174 genomes.** NUPACK (7) lowest energy RNA structure from 83 nt window surrounding each known  $\phi$ X174 gene using sequence variants from WT  $\phi$ X174 and kleenX174 genome sequences.

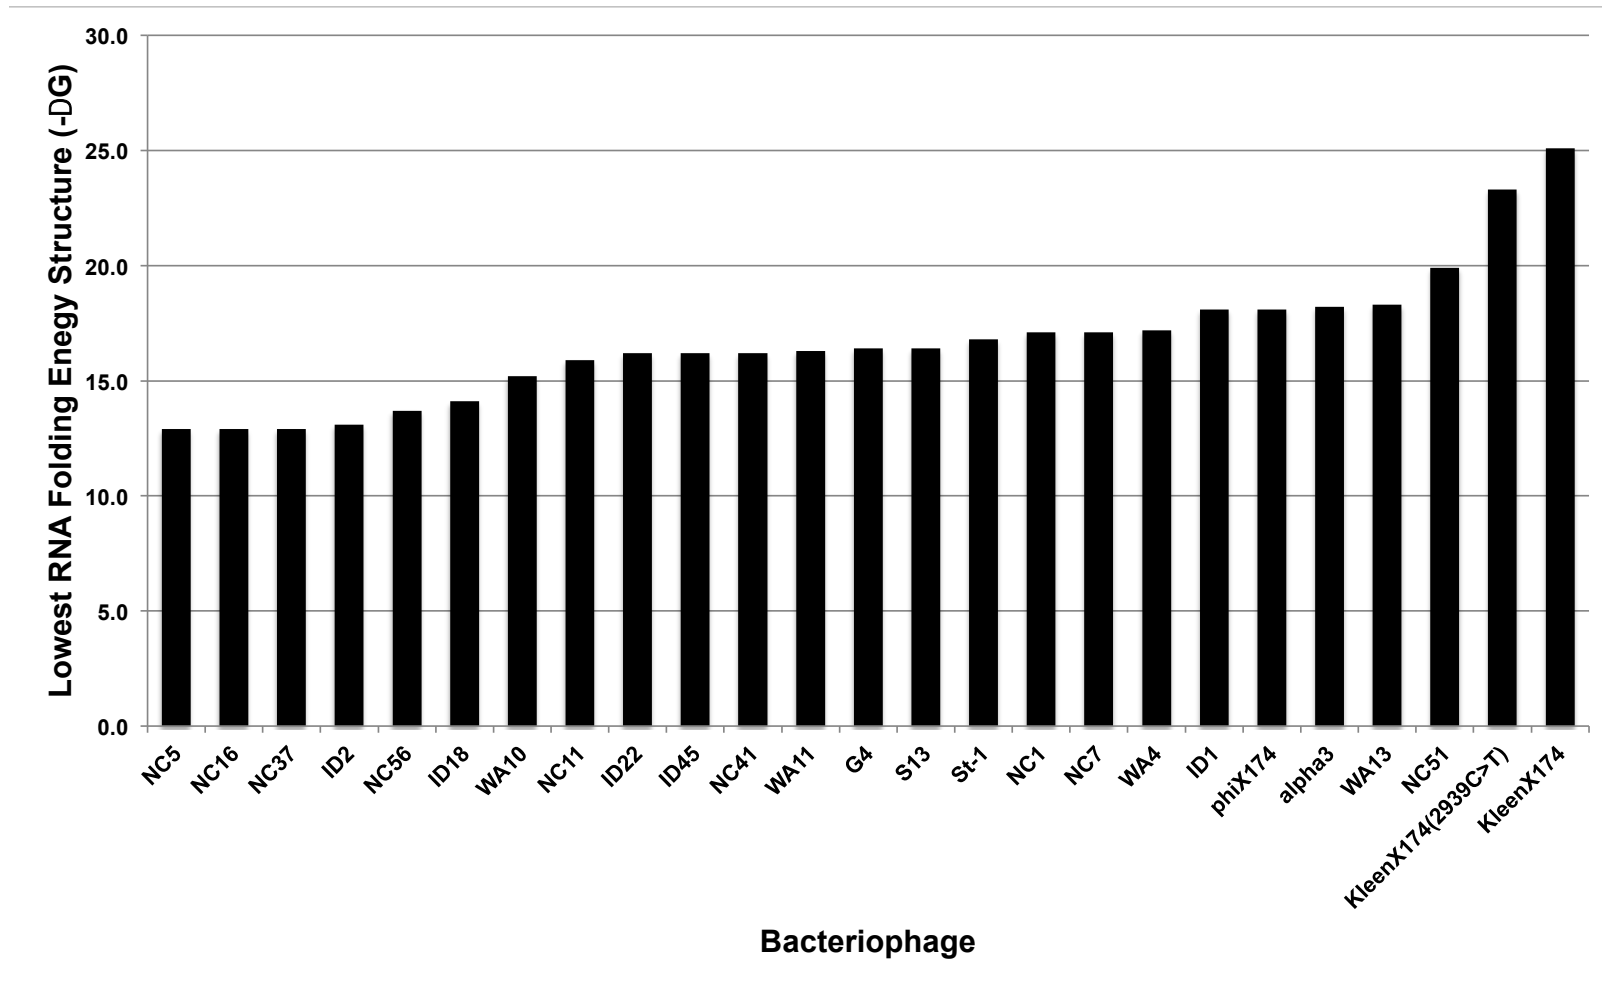

**Fig. S7. Predicted gene H RNA structure in 23 *Bullavirinae* genomes shows kleenX174 and kleenX174(2939C>T) outside the normal range.** Lowest energy structures of RNA folding simulation performed with NUPACK using default parameters. Folding window of 83 nt centered on gene H initiation codon.



**Table S1. Changes made to wild-type øX174 genome to produce cryptX174 design.**

| Genome Coordinate <sup>a</sup> | WT Nucleotide | CryptX Nucleotide | Gene 1 | Codon Affected <sup>b</sup> | Amino Acid Change | Gene 2 | Codon Affected <sup>b</sup> | Amino Acid Change | Gene 3 | Codon Affected <sup>b</sup> | Amino Acid Change |
|--------------------------------|---------------|-------------------|--------|-----------------------------|-------------------|--------|-----------------------------|-------------------|--------|-----------------------------|-------------------|
| 3982                           | T             | C                 | A      | atg > aCg                   | Start (Met) > Thr | -      | -                           | -                 | -      | -                           | -                 |
| 4499                           | G             | A                 | A/A*   | atg > atA                   | Start (Met) > Ile | -      | -                           | -                 | -      | -                           | -                 |
| 5076                           | T             | C                 | B      | atg > aCg                   | Start (Met) > Thr | A/A*   | tgg > Cgg                   | Trp > Arg         | -      | -                           | -                 |
| 53                             | G             | A                 | K      | atg > atA                   | Start (Met) > Ile | A/A*   | gag > Aag                   | Glu > Lys         | -      | -                           | -                 |
| 135                            | G             | A                 | C      | atg > atA                   | Start (Met) > Ile | K      | gag > Aag                   | Glu > Lys         | A/A*   | tga > tAa                   | Stop > Stop       |
| 392                            | G             | A                 | D      | atg > atA                   | Start (Met) > Ile | C      | tga > tAa                   | Stop > Stop       | -      | -                           | -                 |
| 569                            | T             | C                 | E      | atg > aCg                   | Start (Met) > Thr | D      | tag > taC                   | Tyr > Tyr         | -      | -                           | -                 |
| 850                            | G             | A                 | J      | atg > atA                   | Start (Met) > Ile | -      | -                           | -                 | -      | -                           | -                 |
| 1003                           | G             | A                 | F      | atg > atA                   | Start (Met) > Ile | -      | -                           | -                 | -      | -                           | -                 |
| 2397                           | G             | A                 | G      | atg > atA                   | Start (Met) > Ile | -      | -                           | -                 | -      | -                           | -                 |
| 2933                           | G             | A                 | H      | atg > atA                   | Start (Met) > Ile | -      | -                           | -                 | -      | -                           | -                 |

<sup>a</sup>Coordinate in original Sanger øX174 genome sequence (Genbank NC\_001422.1)

<sup>b</sup>Capital letters represent mutated base positions in CryptX174 design.

**Table S2. Oligonucleotides used in this work.**

| Name              | FORWARD/<br>REVERSE | Target            | Sequence                                         |
|-------------------|---------------------|-------------------|--------------------------------------------------|
| Chimera_P1-FOR    | FORWARD             | WT_Part1/KX_Part1 | GTCTAGGAAATAACCGTCAGGATTGACACCC                  |
| Chimera_P2-FOR    | FORWARD             | WT_Part2/KX_Part2 | AAAAACGTGGCCTATGGTTACAGTATGCCATCG                |
| Chimera_P3-FOR    | FORWARD             | WT_Part3/KX_Part3 | GGAGTGATGTAATGTCTAAAGGTAACAAACGTTCTGGCG          |
| Chimera_P4-FOR    | FORWARD             | WT_Part4/KX_Part4 | GGCACTATGTTACTCTTGGCCTTGTTCG                     |
| Chimera_P5_WT-FOR | FORWARD             | WT_Part5          | GCCACTTAAGTGAGGTGATTTATGTTTGGTGCTATTGCTGGCG      |
| Chimera_P5_KX-FOR | FORWARD             | KX_Part5          | GCCACTTAAGTGAGGTGATTTATGTTTGGCCTATTGCTGG         |
| Chimera_P1-REV    | REVERSE             | WT_Part1/KX_Part1 | GCATACTGTAACCATTAAGCCACGTATTTTGCAAGC             |
| Chimera_P2-REV    | REVERSE             | WT_Part2/KX_Part2 | CGTTTTTACCTTTAGACATTACATCACTCCTTCCCG             |
| Chimera_P3_WT-REV | REVERSE             | WT_Part3          | GAACAAGCGCAAGAGTAACATAGTGCCATGCTCAGGAACAAG       |
| Chimera_P3_KX-REV | REVERSE             | KX_Part3          | GAACAAGCGCAAGAGTAACATAGTGCCGTGTTCCGGGAACAAGAAACG |
| Chimera_P4-REV    | REVERSE             | WT_Part4/KX_Part4 | AACATAAATCACCTCACTTAAGTGGCTGG                    |
| Chimera_P5-REV    | REVERSE             | WT_Part5/KX_Part5 | TCAATCCTGACGGTTATTTCCCTAGACAAATTAGAGCCAAATACC    |
| KleenXSeq_1       | FORWARD             | KleenX174 Genome  | CTGGCGACCTGTTTGTAT                               |
| KleenXSeq_2       | FORWARD             | KleenX174 Genome  | CGGATATTTCTGATGAGTCGAA                           |
| KleenXSeq_3       | FORWARD             | KleenX174 Genome  | CTACACGAGGACGCTTTTCA                             |
| KleenXSeq_4       | FORWARD             | KleenX174 Genome  | TCTTCTCAATCCCCAATGC                              |
| KleenXSeq_5       | FORWARD             | KleenX174 Genome  | AAGTCACTGGGGTTTCTGG                              |
| KleenXSeq_6       | FORWARD             | KleenX174 Genome  | ATCTGTCAACGCCGCTAATC                             |
| KleenXSeq_7       | FORWARD             | KleenX174 Genome  | GCCCTAGTTTCTGTTCTGG                              |
| KleenXSeq_8       | FORWARD             | KleenX174 Genome  | GAAATTTATGCGCCAGATGCT                            |

**Dataset S1 (separate file).** PhiX174 ORF characteristics and modifications to generate kleenX174 genome design. Excel file.

**Dataset S2 (separate file).** Wild type sequence gene H synthetic template for cell-free protein expression. Genbank file.

**Dataset S3 (separate file).** KleenX174 sequence gene H synthetic template for cell-free protein expression. Genbank file.

**Dataset S4 (separate file).** KleenX174(2939C>T) sequence gene H synthetic template for cell-free protein expression. Genbank file.

## References

1. Godson GN, Fiddes JC, Barrell BG, Sanger F. Comparative DNA Sequence Analysis of the G4 and phiX174 Genomes. *The Single-Stranded DNA Phages* 8. (1978). doi:10.1101/087969122.8.51
2. Delcher AL, Bratke KA, Powers EC, Salzberg SL (2007) Identifying bacterial genes and endosymbiont DNA with Glimmer. *Bioinformatics* 23 (6):673-679. doi:10.1093/bioinformatics/btm009
3. Besemer J, Borodovsky M (2005) GeneMark: web software for gene finding in prokaryotes, eukaryotes and viruses. *Nucleic Acids Res* 33 (Web Server issue):W451-454. doi:10.1093/nar/gki487
4. Larsen TS, Krogh A (2003) EasyGene--a prokaryotic gene finder that ranks ORFs by statistical significance. *BMC Bioinformatics* 4:21. doi:10.1186/1471-2105-4-21
5. Hyatt D, Chen GL, Locascio PF, Land ML, Larimer FW, Hauser LJ (2010) Prodigal: prokaryotic gene recognition and translation initiation site identification. *BMC Bioinformatics* 11:119. doi:10.1186/1471-2105-11-119
6. Edgar RC (2004) MUSCLE: multiple sequence alignment with high accuracy and high throughput. *Nucleic Acids Res* 32 (5):1792-1797. doi:10.1093/nar/gkh340
7. Zadeh JN, Steenberg CD, Bois JS, Wolfe BR, Pierce MB, Khan AR, Dirks RM, Pierce NA (2011) NUPACK: Analysis and design of nucleic acid systems. *J Comput Chem* 32 (1):170-173. doi:10.1002/jcc.21596
